# Supplementary material
Source: publisher figshare collection journal article supplement (https://tandf.figshare.com/articles/dataset/_/24198311)
Supplement: Supplementary file 1 [file 1]

| **Supplementary Table 3**. Potential predictors of hospital mortality in the entire study sample (N=14,884) | | | | |
| --- | --- | --- | --- | --- |
|  | **Univariable analysis** | | | **Multivariable analysis** |
|  | **Alive**  **(N=12,760)** | **Dead**  **(N=2,124)** | **HR (95% CI); p** | **HR (95% CI); p** |
| **Age (yrs.)** | 65 (52-76) | 75 (66-83) | **1.04 (1.03; 1.04); <0.001** | **1.04 (1.03; 1.04); <0.001** |
| **Female Sex** | 5737 (45.0) | 838 (39.5) | **0.89 (0.82; 0.98); 0.013** | 1.00 (0.84; 1.19); 0.981 |
| **Study groups** |  |  |  |  |
| *Pre-COVID* (Ref.) | 6488 (50.8) | 894 (42.1) | **-** | **-** |
| *COVID negative* | 5476 (42.9) | 823 (38.7) | **1.15 (1.04; 1.26); 0.004** | 1.07 (0.88; 1.30); 0.481 |
| *COVID positive* | 796 (6.2) | 407 (19.2) | **2.06 (1.83; 2.32); <0.001** | **1.64 (1.34; 2.01); <0.001** |
| **Blood Culture** | 1600 (12.5) | 645 (30.4) | **1.61 (1.38; 1.88); <0.001** |  |
| *Negative (Ref.)* | 11160 (87.5) | 1479 (69.6) | **-** | **-** |
| *Anaerobic* | 42 (0.3) | 9 (0.4) | 1.14 (0.54; 2.39); 0.732 | 0.97 (0.45; 2.08); 0.936 |
| *Gram –* | 776 (6.1) | 243 (11.4) | **1.41 (1.09; 1.84); 0.010** | *1.28 (0.99; 1.66); 0.058* |
| *Gram +* | 550 (4.3) | 268 (12.6) | **1.85 (1.47; 2.33); <0.001** | **1.58 (1.27; 1.97); <0.001** |
| *Polymicrobial* | 232 (1.8) | 125 (5.9) | **1.61 (1.18; 2.21); <0.001** | **1.36 (1.00; 1.85); 0.047** |
| **ICU** | 993 (7.8) | 598 (28.2) | **1.86 (1.51; 2.30); <0.001** | **1.68 (1.38; 2.03); <0.001** |
| **Comorbidities** |  |  |  |  |
| *Diabetes* | 2027 (15.9) | 471 (22.2) | **1.40 (1.26; 1.55); <0.001** | 1.03 (0.84; 1.27); 0.782 |
| *Immune depression* | 2534 (19.9) | 319 (15.0) | **1.32 (1.01; 1.72); 0.043** | **1.40 (1.09; 1.79); 0.009** |
| *Neurological disorders* | 1855 (14.5) | 579 (27.3) | 0.88 (0.66; 1.18); 0.405 |  |
| *Neoplasms* | 5430 (42.6) | 730 (34.4) | 0.94 (0.80; 1.11); 0.495 |  |
| *Kidney failure* | 1838 (14.4) | 635 (29.9) | **2.49 (2.09; 2.96); <0.001** | **1.83 (1.57; 2.15); <0.001** |
| **Abbreviations**: HA-BSI: hospital-acquired bloodstream infection; positive and negative BCs: Blood cultures that were positive and negative for HA-BSI; COVID: COronaVIrus Disease; ICU: intensive care unit; HR: hazard ratio; CI: confidence interval;  Descriptive statistics are expressed as median (interquartile range: IQR) for quantitative data, as absolute and relative percentage frequencies for qualitative variables. In bold significant findings (p<0.05), in italic the suggestive ones (0.05≤p<0.10). | | | | |
